# Supplementary material for: Evaluation of recombinase polymerase amplification for detection of begomoviruses by plant diagnostic clinics
Source: Springer Nature journal article supplement (doi:10.1186/s12985-016-0504-8), 2016-03-21
Supplement: MOESM2 [file 9770600]

## Additional file 2

Table S1. Assay costs for recombinase polymerase amplification (RPA) and polymerase chain reaction (PCR) assays for detection of TYLCV

| Assay | Template      | Processing Sample Size <sup>a</sup> | Extraction                     |          | Amplification <sup>c</sup> |          | Total Cost Reagents (\$) | Total Time (h) | Total Costs (\$) <sup>d</sup> |
|-------|---------------|-------------------------------------|--------------------------------|----------|----------------------------|----------|--------------------------|----------------|-------------------------------|
|       |               |                                     | Reagent cost (\$) <sup>b</sup> | Time (h) | Reagent cost (\$)          | Time (h) |                          |                |                               |
| PCR   | Pur DNA       | 1                                   | 4.26                           | 1.00     | 1.32                       | 1.50     | 5.40                     | 2.50           | 92.90                         |
| RPA   | Pur DNA       | 1                                   | 4.26                           | 1.00     | 5.50                       | 0.67     | 9.76                     | 1.67           | 68.21                         |
| RPA   | Crude extract | 1                                   | 0.00                           | 0.01     | 5.50                       | 0.67     | 5.50                     | 0.68           | 29.30                         |
| PCR   | Pur DNA       | 13                                  | 55.38                          | 1.20     | 17.16                      | 1.83     | 72.54                    | 3.03           | 178.59                        |
| RPA   | Pur DNA       | 13                                  | 55.38                          | 1.20     | 71.50                      | 0.75     | 126.88                   | 1.95           | 195.13                        |
| RPA   | Crude extract | 13                                  | 0.0                            | 0.17     | 71.50                      | 0.75     | 71.50                    | 0.92           | 103.73                        |

<sup>a</sup> Number of plant samples tested at one time

<sup>b</sup> Costs of reagents per sample used in these studies. All costs are estimated from prices current as of June 2015 and are in US dollars.

<sup>c</sup> For PCR assumes 1.3 h amplification program; for RPA assumes 20 min amplification, heating at 65 °C for 10 min followed by centrifugation at 3,800 rcf for 10 min.

<sup>d</sup> Reagent and labor costs: These are the costs incurred in the reported studies. Costs do not include agarose gel electrophoresis. A rate of \$35.00 per hour for labor was used in the calculations.
